# Supplementary material for: Ultrafast (400 Hz) network oscillations induced in mouse barrel cortex by optogenetic activation of thalamocortical axons
Source: eLife. 2023 May 9;12:e82412. doi: 10.7554/eLife.82412 (PMC10212562; doi:10.7554/eLife.82412)
Supplement: Figure 1—source data 1. — Four male mice (4–6 weeks old) were deeply anesthetized with 2.5% Avertin and transcardially perfused with saline followed by 50 ml 4% paraformaldehyde (PFA). Brains were removed, post-fixed in 4% PFA at room temperature for 4 hr, stored for at least 72 hr in 30% sucrose solution in phosphate buffered saline (PBS) at 4°C, and sectioned coronally on a freezing stage sliding microtome. For imaging, five 60 μm sections were sampled per brain at 240 μm intervals, in total extending 800–2000 μm posterior to bregma, as determined by comparison with the Paxinos and Franklin atlas (Paxinos and Franklin, The Mouse Brain in Stereotaxic Coordinates, 4th edition, Academic Press 2012). Confocal image stacks were taken with a ×10 objective at 2.5 μm Z-steps on a Zeiss LSM 710 or a Nikon A1R confocal microscope. Labeled cells were counted by visual inspection of the full stack and summed per area over the five sections from each animal; counts thus represent the number of cells in a composite 300 μm section. Areal boundaries follow the designations in the Paxinos and Franklin atlas. [file elife-82412-fig1-data1.xlsx]

## Sheet: Counts
	Age	Sex	Atlas Fig	S2, EcC	BF 2/3	BF 4	BF 5/6	S1 (nBF)	M1/M2	CgC	TOTAL
DH0 1	29	M	38	49	17	0	7	21	6	7	107
DH0 2			40	37	12	0	15	12	3	6	85
DH0 3			42	19	10	0	5	12	6	10	62
DH0 4			44	23	5	0	7	14	1	15	65
DH0 5			46	22	8	1	12	1	3	11	58
total				150	52	1	46	60	19	49	377
DH2 1	28	M	38	39	2	1	4	22	4	11	83
DH2 2			40	25	2	0	10	13	0	10	60
DH2 3			42	17	7	0	9	13	1	3	50
DH2 4			44	13	2	0	4	7	2	8	36
DH2 5			46	11	3	0	8	2	4	14	42
total				105	16	1	35	57	11	46	271
DH3 1	39	M	38	32	5	0	14	22	3	10	86
DH3 2			40	24	12	0	10	21	7	16	90
DH3 3			42	19	9	0	17	22	2	18	87
DH3 4			44	19	2	1	13	13	1	15	64
DH3 5			46	30	1	0	12	2	6	21	72
total				124	29	1	66	80	19	80	399
DH4 1	39	M	38	58	12	1	2	22	6	10	111
DH4 2			40	24	14	1	6	15	5	14	79
DH4 3			42	41	10	0	5	13	5	13	87
DH4 4			44	19	11	0	12	7	2	24	75
DH4 5			46	14	1	0	7	3	3	18	46
total				156	48	2	32	60	21	79	398
											0
Average				133.75	36.25	1.25	44.75	64.25	17.5	63.5	361.25
SD				23.6696	16.8201	0.5	15.3921	10.5948	4.43471	18.5203	61.0157
