# Supplementary material for: Ultrafast (400 Hz) network oscillations induced in mouse barrel cortex by optogenetic activation of thalamocortical axons
Source: eLife. 2023 May 9;12:e82412. doi: 10.7554/eLife.82412 (PMC10212562; doi:10.7554/eLife.82412)
Supplement: Figure 2—source data 1. — Analysis was done on a subset of 32 FS interneurons and 25 RS cells in slices from 25 and 22 animals, respectively, 3–6.5 weeks old (14 animals were common to both subsets). A total of eight electrophysiological parameters were analyzed per cell. Single-spike parameters were measured at rheobase (minimal current evoking an action potential). All current steps were 600 ms long. Electrophysiological parameters definitions: Vrest: resting potential upon break-in, with no holding current applied. Vthreshold: the voltage where dv/dt = 5 V/s. Spike height: Spike peak-Vthreshold. Spike width at half-height (SWHH): spike width measured half-way between Vthreshold and spike peak. After Hyperpolarization (AHP): Vthreshold -spike trough. Input Resistance (Rin): the slope of the I-V plot, calculated from 4 to 6 positive and negative subthreshold current steps, at membrane potentials up to ±15 mV from rest. Imax: the maximal current step applied before a noticeable reduction in spike height. Fmax: the maximal steady-state firing frequency, computed as the reciprocal of the average of the last five interspike intervals (ISIs) in a spike train elicited by Imax. [file elife-82412-fig2-data1.xlsx]

## Sheet: 2019-2022
Type	Cell ID	Age	Year	Sex	Vrest	Spike height	SWHH	Threshold	AHP	Rin	Imax	Fmax
FS	042821_DFI_P40, P#2, C#2	41	21	M	-60.615	86.279	0.19	-49.535	18.139	94	600	300.481
FS	042821_DFI_P40, P#1, C#2	41	21	M	-61.877	82.5	0.21	-48.469	16.415	30.2	800	233.1
FS	042021_DFI_P32, P#1,C#2	33	21	F	-67	71.802	0.26	-53.091	17.675	52.5	850	247.893
FS	032321_DFI_P45,P#1,C#1	43	21	F	-63.2	63.37	0.25	-44.77	15.31	88	500	203.583
FS	121620_DFI_P45,P#1	45	20	F	-58.8	78.61	0.27	-36.98	16.97	58.1	725	139.392
FS	100820_DFI_P27\P#1,C#1	27	20	F	-67.2	77.51	0.27	-49.17	14.17	63.3	650	197.55
FS	091820_DFI_P45\P#1	45	20	M	-67.5	73.26	0.26	-42.79	19.3	88.2	650	251.636
FS	031820_DFI_P41, \FP#1	41	20	M	-69.9	76.96	0.26	-48.24	15.77	49.1	1000	229.358
FS	031320_DFI_P36_P#1_ME1	36	20	M	-66.512	76.46	0.247	-47.07	15.02	47	600	251.004
FS	031120_DFI_P34_P#1_ME2	34	20	M	-63.023	68.34	0.28	-43.215	17.025	88	550	209.908
FS	031020_DFI_P33_P#2_ME2	33	20	M	-67.326	82.384	0.26	-42.837	25.451	63	550	225.836
FS	031020_DFI_P33_P#1_ME2	33	20	M	-63.488	85.59	0.294	-52.38	13.08	77	475	271.297
FS	031020_DFI_P33_P#1_ME1	33	20	M	-63.023	67.01	0.295	-47.24	14.89	66	550	277.932
FS	030520_DFI_P28_P#2_ME1	28	20	M	-67.965	76.667	0.24	-43.593	19.167	65	600	207.211
FS	030520_DFI_P28_P#1_ME1	28	20	M	-62.326	81.87	0.25	-45.645	17.208	64	450	197.628
FS	030420_DFI_P27_P#2_ME2	27	20	M	-65.814	64.745	0.29	-46.861	12.216	66	500	174.764
FS	030420_DFI_P27_P#1_ME2	27	20	M	-66.686	87.55	0.252	-52.86	11.42	45	600	225.734
FS	030420_DFI_P27_P#1_ME1	27	20	M	-59.38	69	0.272	-38.16	16.12	65	475	174.095
FS	030320_DFI_P26_P#2_ME2	26	20	M	-63.52	82.306	0.26	-45.705	17.975	60	600	217.108
FS	030320_DFI_P26_P#1_ME1	26	20	M	-68.091	86.971	0.28	-50.763	11.859	48	700	182.083
FS	121919_DFI_P37_P#1_ME1	37	19	F	-72.326	82.75	0.254	-46.54	17.23	66	575	221.828
FS	110719_DFI_P41_P#1_ME2	41	19	M	-68.605	77.42	0.221	-47.32	17.43	53	650	177.305
FS	092619_DFI_P37_P#2_ME1	37	19	M	-70.097	76.246	0.23	-45.217	20.135	57	700	206.954
FS	091819_DFI_P28_P#1_ME2	28	19	F	-70.097	86.005	0.24	-49.249	16.67	52	800	259.336
FS	091719_DFI_P27_P#1_ME2	27	19	M	-67.326	75.02	0.242	-43.77	18.62	63	525	248.509
FS	090919_DFI_P31_P#1_ME2	31	19	F	-67	74.93	0.22	-45.49	18.43	49	550	198.334
FS	090619_DFI_P36_P#1_ME1	36	19	F	-63.372	47.569	0.29	-38.625	14.209	60	450	154.416
FS	090519_DFI_P35_P#1_ME2	35	19	M	-70.32	82.081	0.22	-43.31	26.163	51	700	222.321
FS	082219_DFI_P45_P#1_ME1	45	19	F	-61.712	83.46	0.237	-51.69	11.44	83	300	268.097
FS	082019_DFI_P43_P#1_ME1	43	19	M	-63.411	80.43	0.232	-51.28	13.69	43	650	195.542
FS	022019_DFI_P23_P#2_ME2	23	19	M	-67.279	87.45	0.19	-43.17	20.75	48	700	295.159
FS	021919_DFI_P22_P#1_ME2	22	19	F	-66.657	79.419	0.18	-50.755	17.988	40	950	252.143
RS	042821_DFI_P40, P#2, C#1	41	21	M	-68.696	92.965	0.88	-39.767	19.4	224.8	130	23.394
RS	042821_DFI_P40, P#1, C#1	41	21	M	-70	96.512	0.79	-40	10.93	229	400	28.9586
RS	042021_DFI_P32, P#1,C#1	33	21	F	-69.3	83.401	0.91	-51.899	5.892	236	200	32.7783
RS	032321_DFI_P45,P#1,C#2	43	21	F	-70.2	76.51	0.82	-38.14	5.81	272.3	200	28.8317
RS	100820_DFI_P27\P#1,C#2	27	20	F	-70.2	92.97	0.89	-50.02	1.61	246	300	33.9213
RS	091520_DFI_P42\P#1	42	20	M	-68.4	94.19	0.72	-46.28	7.67	278	160	36.5497
RS	091020_DFI_P37, \P#1	0		M	-72.2	81.62	0.9	-40.19	5.55	150	260	34.9724
RS	031620_DFI_P39\C#2	0		M	-78	90.18	0.8	-43.8	4.26	147	240	32.0842
RS	031020_DFI_P33_P#2_ME1	33	20	M	-73.45	95.033	0.85	-47.325	2.933	203	220	37.0425
RS	030520_DFI_P28_P#2_ME2	28	20	M	-69.922	81.553	0.86	-41.194	5.353	199	240	37.6166
RS	030520_DFI_P28_P#1_ME2	28	20	M	-70.097	89.011	0.9	-44.027	6.913	153	240	36.5203
RS	030420_DFI_P27_P#2_ME1	27	20	M	-70.097	89.011	0.9	-44.027	6.913	297	130	26.8644
RS	092619_DFI_P37_P#1_ME2	37	19	M	-72.442	87.405	0.7	-42.086	6.311	80	600	41.3873
RS	092019_DFI_P30_P#1_ME1	30	19	M	-62.548	92.52	0.882	-44.57	2.65	134	220	23.1225
RS	091819_DFI_P28_P#1_ME1	28	19	F	-69.099	70.543	0.78	-43.217	6.032	168	260	34.6093
RS	090619_DFI_P36_P#1_ME2	36	19	F	-72.132	91.736	0.66	-37.914	11.681	333	220	37.8243
RS	090519_DFI_P35_P#2_ME1	35	19	M	-70.097	71.559	0.71	-39.234	9.836	106	475	41.0981
RS	082219_DFI_P45_P#2_ME1	45	19	F	-72.442	84.588	0.62	-42.875	6.507	120	325	34.5949
RS	082019_DFI_P43_P#1_ME2	43	19	M	-74.302	87.116	0.64	-36.809	9.469	140	275	36.0101
RS	022019_DFI_P23_P#2_ME1	23	19	M	-75.969	88.13	0.671	-39.7	7.64	140	325	34.303
RS	021819_DFI_P24_P#2_ME2	24	19	M	-72.19	92.23	0.65	-43.76	3.86	143	300	30.9809
RS	050218_DFI_P21_P#1_ME2	21	18	F	-69.186	98.59	0.685	-47.62	2.38	135	260	33.7769
RS	032918_DFI_P29_P#2_ME2	29	18	M	-72.235	99.19	0.635	-45.89	3.5	156	260	37.6619
RS	032918_DFI_P29_P#1_ME2	29	18	M	-70.572	105.45	0.697	-48.13	2.38	135	260	38.0865
RS	032818_DFI_P28_P#1_ME2	28	18	F	-64.205	102.31	0.808	-47.61	-1.17	226
FS		32	32		32	32	32	32	32	32	32	32	25 animals
		33.7188	19.75		-65.6703	77.2489	0.248313	-46.4309	16.8105	60.7	624.219	222.423
		6.96644	0.672022		3.38986	8.58057	0.0301506	4.17836	3.42756	15.3309	147.49	39.2288
		1.2315	0.118798		0.599247	1.51684	0.00532993	0.738636	0.605913	2.71015	26.0729	6.93473
RS		25	19		25	25	25	25	25	25	24	24	22 animals
		30.04	19.7368		-70.7192	89.3729	0.77432	-43.4434	6.1724	186.044	270.833	33.8746	14 common animals
		11.3265	0.805682		3.18846	8.63971	0.101284	3.9816	4.0911	65.3398	103.731	4.83867
		2.2653	0.184836		0.637691	1.72794	0.0202567	0.796321	0.818219	13.068	21.174	0.987688
